# Supplementary material for: Differential H2O2 Metabolism among Glioblastoma Subtypes Confers Variable Responses to Pharmacological Ascorbate Therapy Combined with Chemoradiation
Source: MDPI journal article supplement (doi:10.3390/ijms242417158), 2023-12-05
Supplement: s1 [file s1]

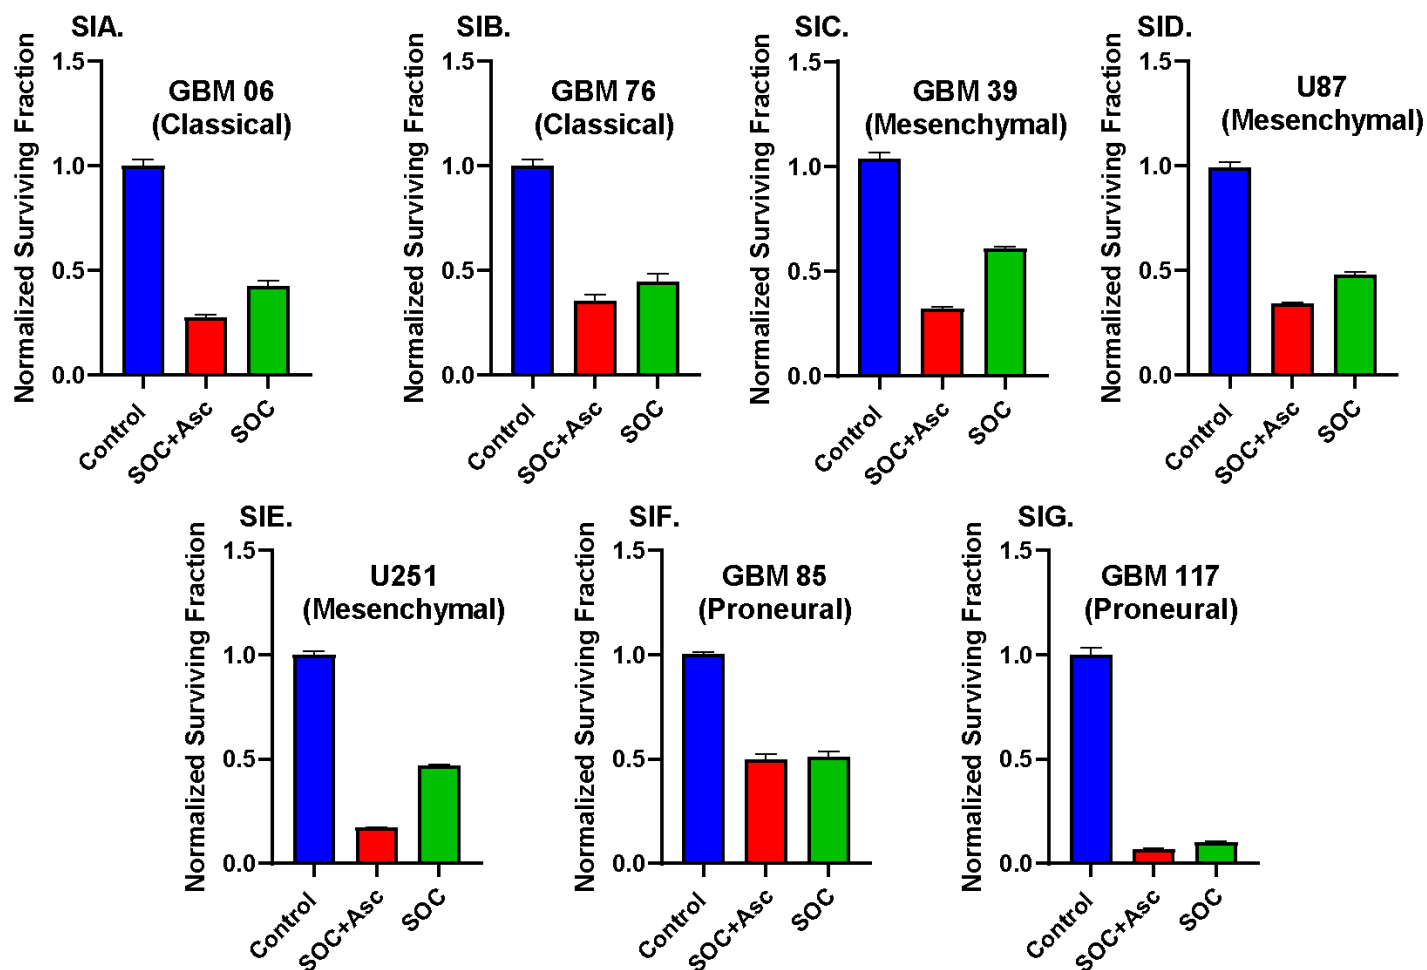

**Figure S1. The effect of P-AscH<sup>+</sup> on response to standard of care (SOC) therapy in GBM cell lines.** Data shown in classical, mesenchymal, and proneural GBM cells. Data are representing 3 replicates in each cell line (n = 3), GBM39 (n = 2). Error bars represent standard error of the mean (SEM).

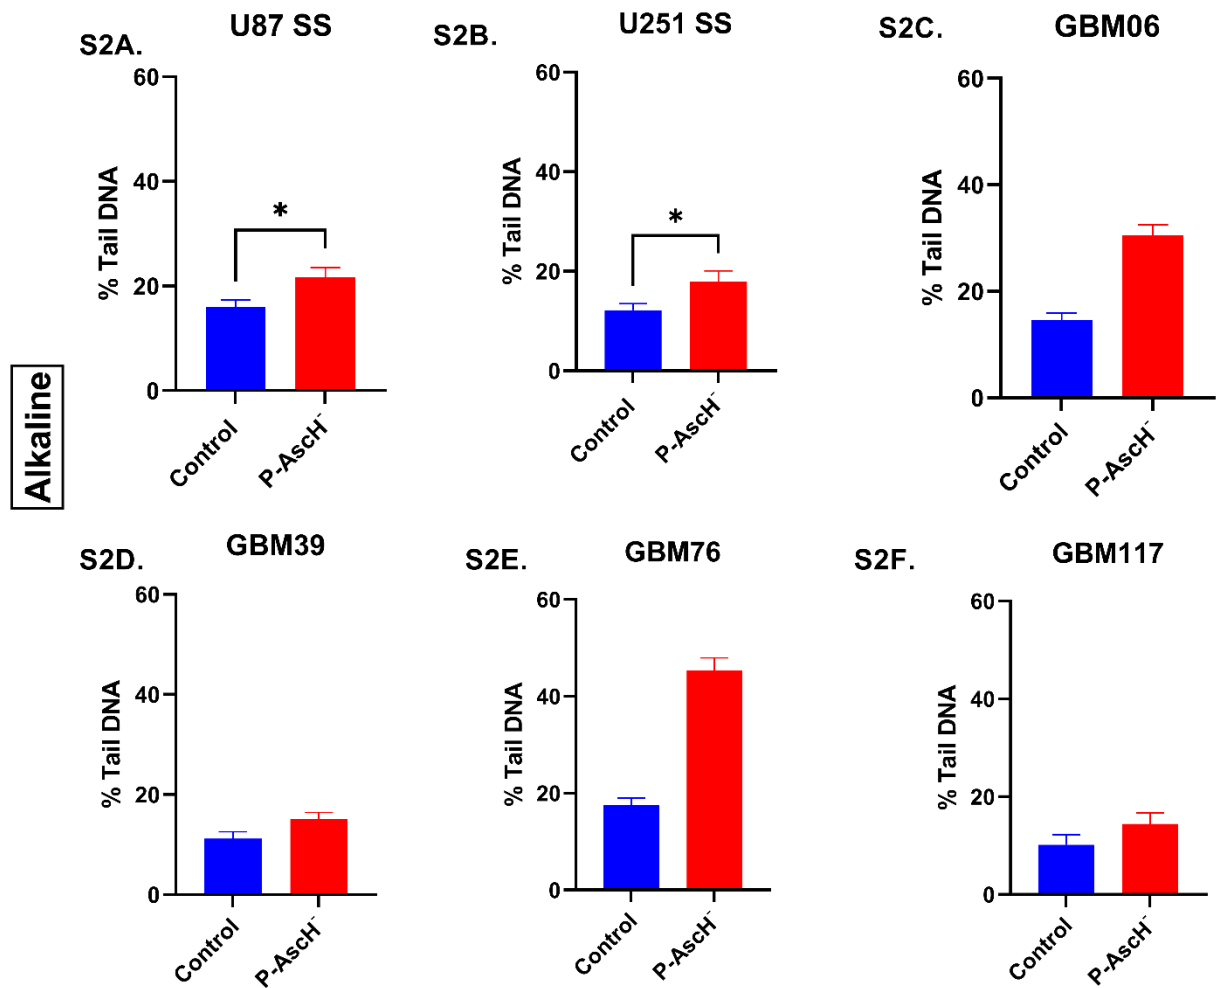

**Figure S2. Single-strand DNA damage following P-Asch<sup>-</sup> treatment in GBM cells.** Single strand DNA damage as % Tail DNA following an alkaline comet assay in GBM cells treated with 20 pmol/cell P-Asch<sup>-</sup> for 1 hour. Data are representing 3 replicates in each cell line (n = 3). Error bars represent standard error of the mean (SEM).

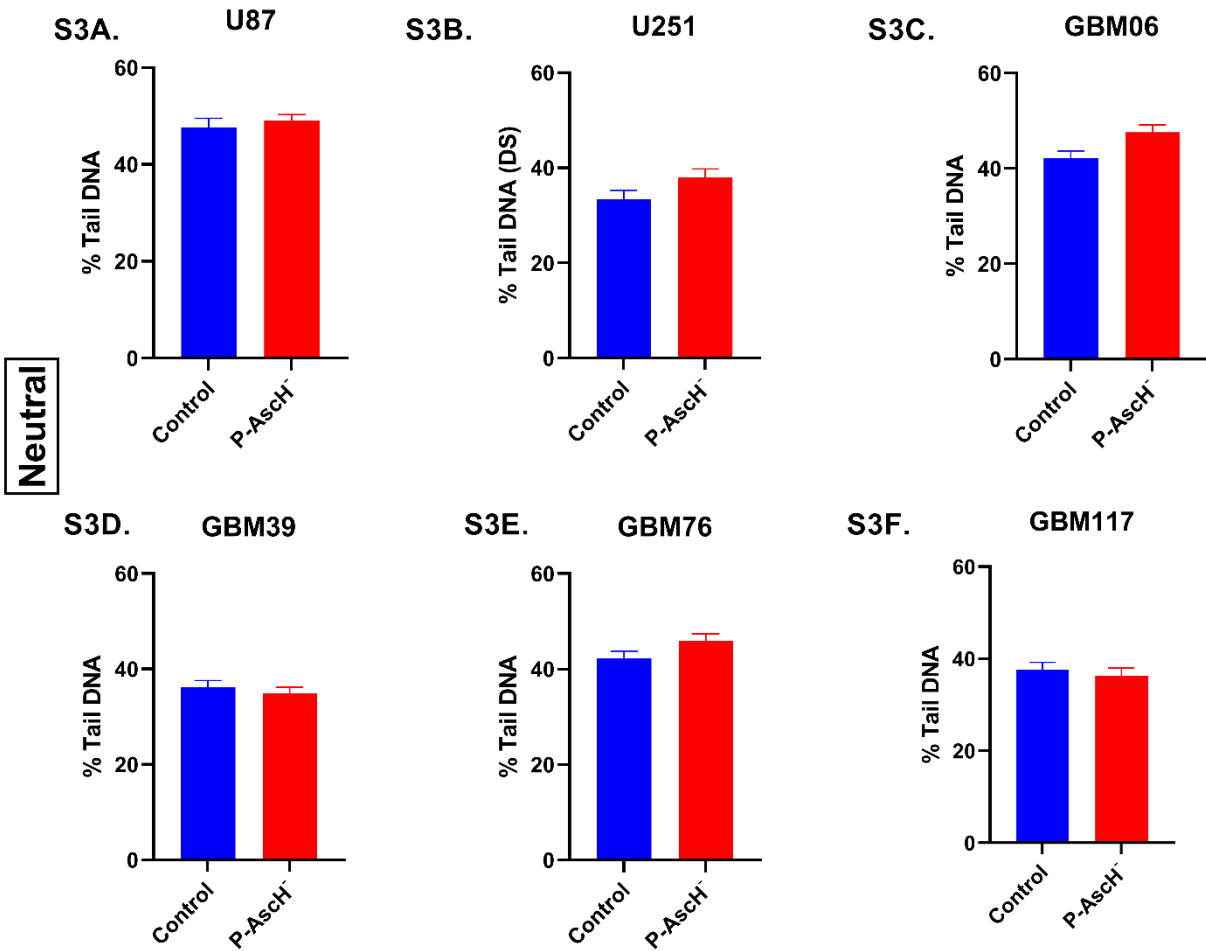

**Figure S3. Double-strand DNA damage following P-AsCH<sup>-</sup> treatment in GBM cells.** Double strand DNA damage as % Tail DNA following a neutral comet assay in GBM cells treated with 20 pmol/cell P-AsCH<sup>-</sup> for 1 hour. Data are representing 3 replicates in each cell line (n = 3). Error bars represent standard error of the mean (SEM).

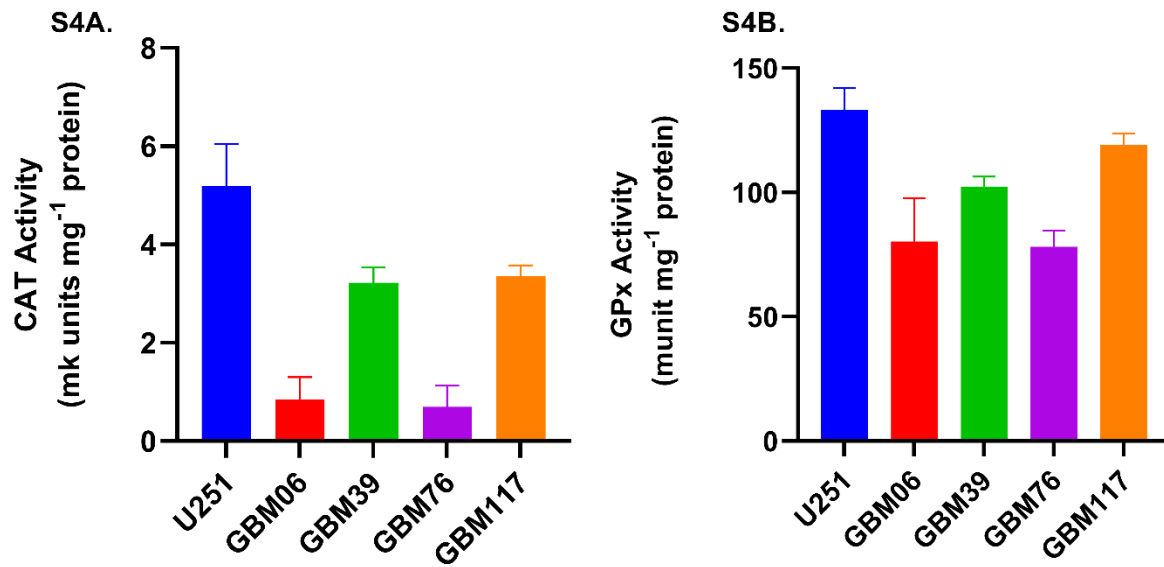

**Figure S4. Catalase and glutathione peroxidase (GPx) enzyme activities in GBM cells. S4A.** Catalase activity (mk units per mg protein) in GBM cells. **S4B.** GPx1 activity (munit per mg protein) in GBM cells. Data are representing 3 replicates in each cell line (n = 3). Error bars represent standard error of the mean (SEM).

**Table S1. Hydrogen peroxide (H<sub>2</sub>O<sub>2</sub>) removal capacities among GBM cell lines of different subtypes.** H<sub>2</sub>O<sub>2</sub> removal rates (10<sup>-12</sup> s<sup>-1</sup> cell<sup>-1</sup> L) in GBM cells ± the standard deviation. Data are representing 3 replicates in each cell line (n = 3).

| Cell Line | Subtype     | Avg. H <sub>2</sub> O <sub>2</sub> Removal Rate kcell<br>(10 <sup>-12</sup> s <sup>-1</sup> cell <sup>-1</sup> L) | ± SD  |
|-----------|-------------|-------------------------------------------------------------------------------------------------------------------|-------|
| GBM 06    | Classical   | 3.68                                                                                                              | ± 1.5 |
| GBM 76    | Classical   | 5.2                                                                                                               | ± 1.9 |
| GBM 39    | Mesenchymal | 1.76                                                                                                              | ± 0.9 |
| U87       | Mesenchymal | 5.66                                                                                                              | ± 2.1 |
| U251      | Mesenchymal | 11.7                                                                                                              | ± 4.0 |
| GBM85     | Proneural   | 23.6                                                                                                              | ± 5.1 |
| GBM117    | Proneural   | 18.0                                                                                                              | ± 2.5 |
